# Supplementary material
Source: MDPI journal article supplement (https://www.mdpi.com/2076-3387/14/4/63)
Supplement: s1 [file s1]

Archive with 1 entries (1 files):
- admsci-2923509-supplementary.pdf
